# Supplementary material for: Organoids transplantation attenuates intestinal ischemia/reperfusion injury in mice through L-Malic acid-mediated M2 macrophage polarization
Source: PubMed Central journal article supplement (PMC10600233; doi:10.1038/s41467-023-42502-0), 2023-10-25
Supplement: 41467_2023_42502_MOESM1_ESM.pdf [file 41467_2023_42502_MOESM1_ESM.pdf]

Supplementary Information for  
**Organoids transplantation attenuates intestinal ischemia/reperfusion  
injury in mice through L-malic acid-mediated M2 macrophage  
polarization**

List of all Authors: Fang-Ling Zhang *et al.*

\*Corresponding author: Ke-Xuan Liu. Email: liukexuan705@163.com

## Supplementary Figures and figure legends

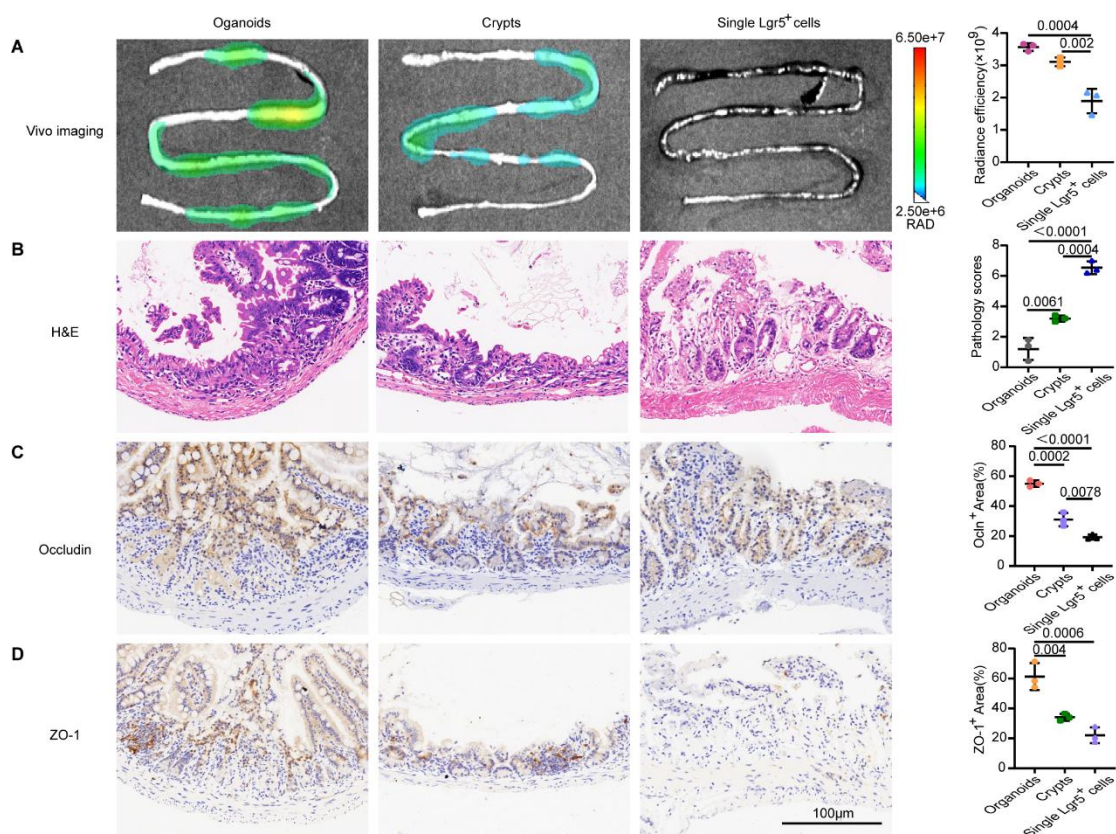

**Supplementary Figure 1. Analysis the treatment efficacy of three alternative grafting materials. Related to Figure 1.**

(A) Ex vivo imaging of transplanted organoids, fresh isolated crypts, and sorted LGR5<sup>+</sup> stem cells excised from transplanted mice at 36 h and the quantification of the fluorescence signal (n=3 mice/group). (B) Representative H & E images and the analysis of pathology scores in transplanted organoids, fresh isolated crypts, and sorted LGR5<sup>+</sup> stem cells excised from transplanted mice at 36 h after intestinal I/R (n=3 mice/group). (C) Representative immunohistochemistry images and quantification of the area of Occludin staining in transplanted organoids, fresh isolated crypts, and sorted LGR5<sup>+</sup> stem cells excised from transplanted mice at 36 h after intestinal I/R (n=3 mice/group). (D) Representative immunohistochemistry

images and quantification of the area of ZO-1 staining in transplanted organoids, fresh isolated crypts, and sorted LGR5<sup>+</sup> stem cells excised from transplanted mice at 36 h after intestinal I/R (n=3 mice/group). Scale bar, 100  $\mu$ m. The statistical tests employed included: one-way ANOVA followed by the Tukey test for multiple comparisons. \*P < 0.05, \*\* P < 0.01, \*\*\* P < 0.001, \*\*\*\* P < 0.0001. Each dot represents data from a single mouse (A-D). Bar graphs represent mean  $\pm$  standard deviation (SD). Source data are provided as a Source Data file.

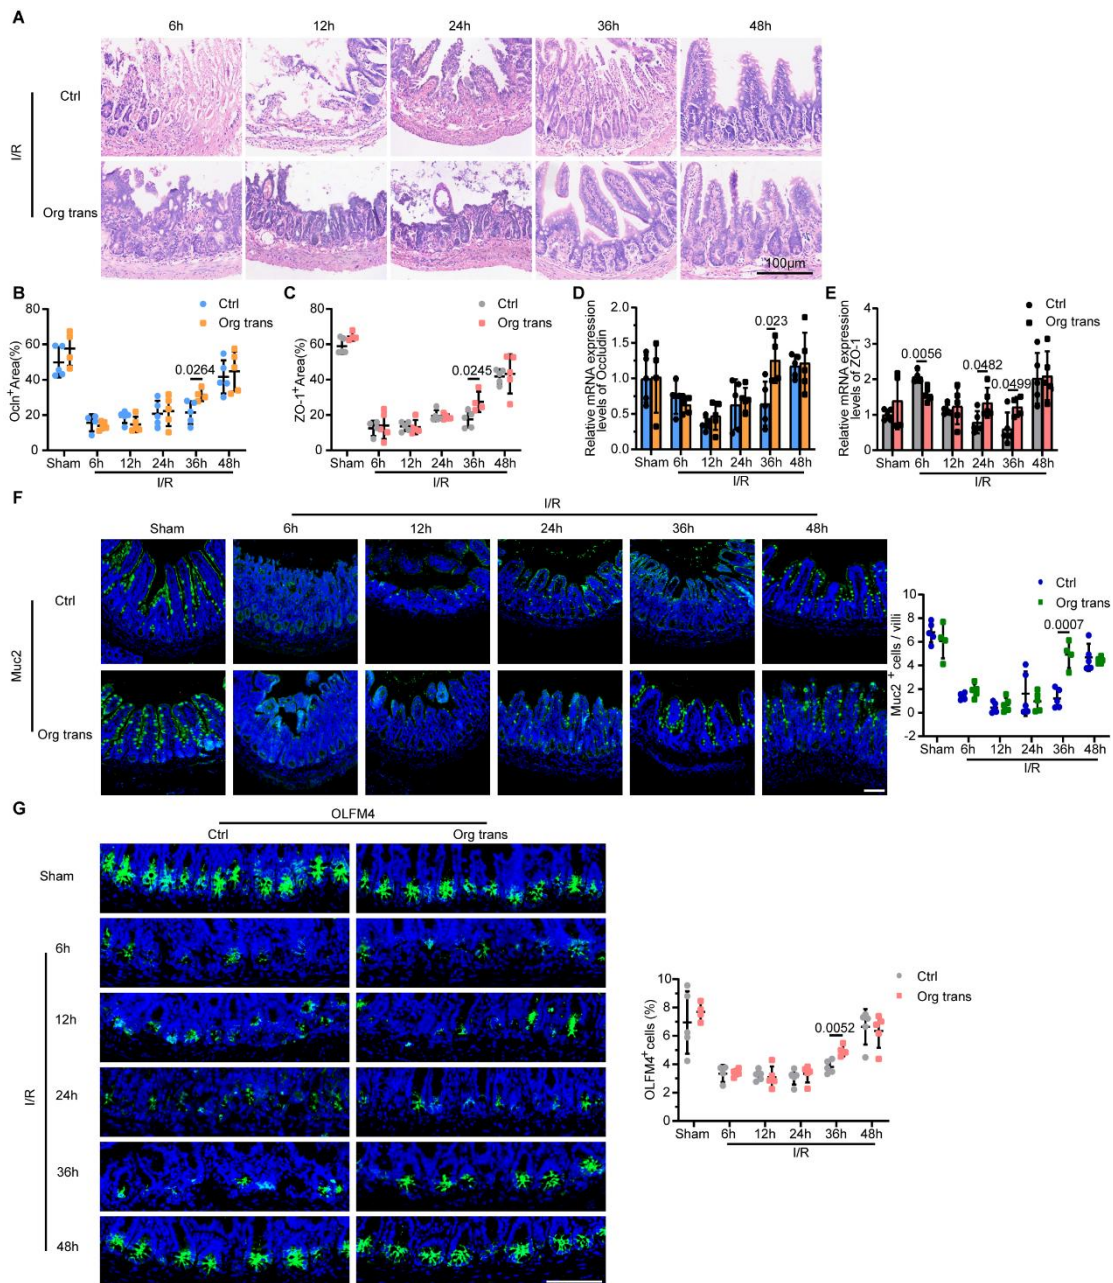

**Supplementary Figure 2. Organoids transplantation contribute to promote mucosal recovery and self-renewal. Related to Figure 1.**

(A) Representative images of Hematoxylin and eosin (H & E) staining of small intestinal tissue. (B) Quantification of the area of Occludin immunohistochemistry staining. (C) Quantification of the area of ZO-1 immunohistochemistry staining (n = 4 mice for sham group with organoids transplanted, control group at 6 h and transplanted group at 36 h, n = 5 mice for the rest groups). (D and E) qRT-PCR

analysis of Occludin (C) and ZO-1 (D) mRNA in small intestinal tissues from mice at indicated time points after intestinal I/R (n = 4 mice for sham group with organoids transplanted, control group at 6 h and transplanted group at 36 h, n = 5 mice for the rest groups). (F) Immunofluorescence image of the intestinal villus following Muc2 staining and quantification of Muc2<sup>+</sup> goblet cells (n = 4 mice for sham group with organoids transplanted, control group at 6 h and transplanted group at 36 h, n = 5 mice for the rest groups). (G) Immunofluorescence image of intestinal crypts following OLFM4<sup>+</sup> staining and quantification of the mean immunofluorescence area of OLFM4<sup>+</sup> cells (n = 4 mice for sham group with organoids transplanted, control group at 6 h and transplanted group at 36 h, n = 5 mice for the rest groups). Twenty-five villus or crypts from each mouse were obtained for each group. Scale bar, 100  $\mu$ m. The statistical tests employed included: two-tailed student's t-test and Mann-Whitney test. \*P < 0.05, \*\* P < 0.01, \*\*\* P < 0.001. Each dot represents data from a single mouse (B-G). Bar graphs represent mean  $\pm$  SD. Source data are provided as a Source Data file.

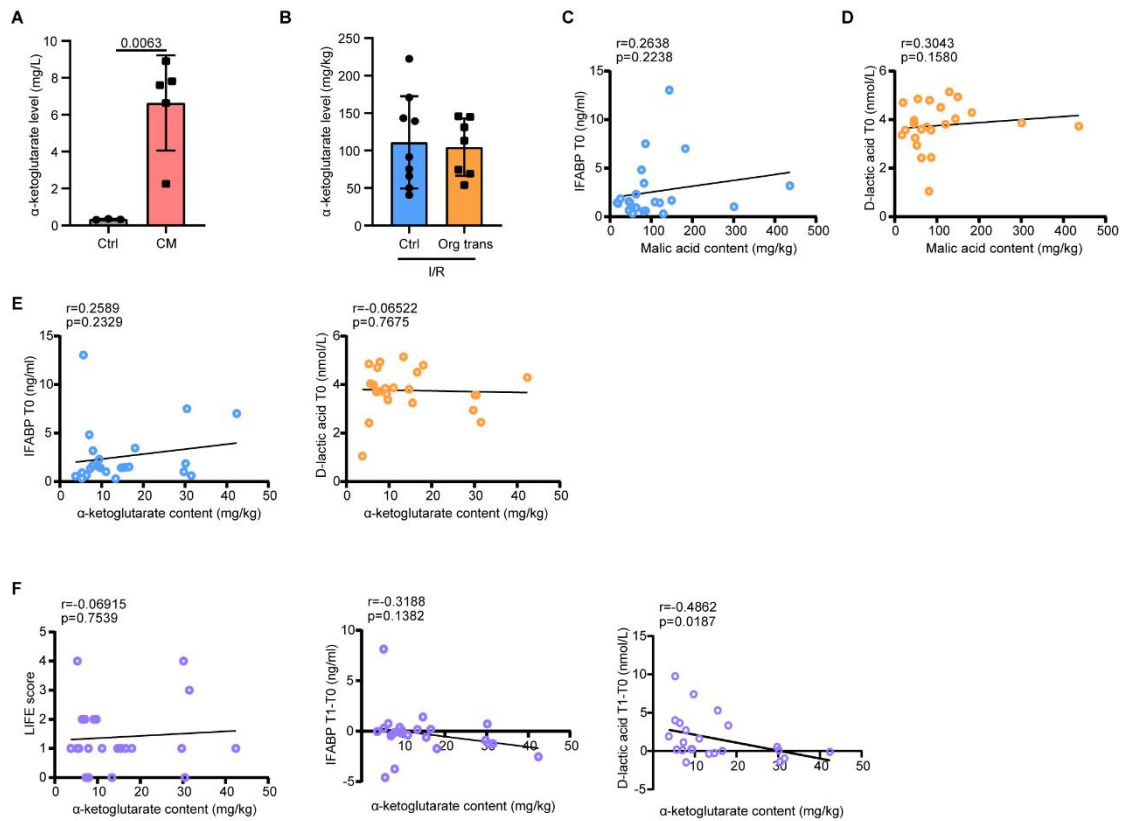

**Supplementary Figure 3. Relationship between TCA metabolites and postoperative intestinal injury in patients undergoing cardiopulmonary bypass surgery. Related to Figure 4.**

(A)  $\alpha$ -ketoglutarate levels in organoid-derived conditioned and control medium groups using targeted LC-MS metabolomic analysis (n = 3 biological replicates for control group, n = 5 biological replicates for CM group). (B)  $\alpha$ -ketoglutarate levels in the cecal contents of the organoid-transplanted and control group 36 h after I/R using targeted LC-MS metabolomic analysis (n = 7 mice for control group, n = 9 mice for transplanted group). (C) Correlation analysis between preoperative fecal MA levels and serum I-FABP levels in patients at T0 (n = 23 samples/group). (D) Correlation analysis between preoperative fecal MA levels and serum D-lactate levels in patients at T0 (n = 23 samples/group). (E) Correlation analysis between preoperative fecal

$\alpha$ -ketoglutarate levels and serum I-FABP and D-lactate levels in patients at T0 (n = 23 samples/group). (F) Correlation analysis between preoperative patient fecal  $\alpha$ -ketoglutarate content and LIFE score, serum I-FABP, and D-lactate levels in patients at T1 compared to T0 (n = 23 samples/group). The statistical employed included: two-tailed student's t-test and Spearman's correlation coefficients. \*P < 0.05, \*\* P < 0.01. Each dot represents data from a single sample (A-F). Bar graphs represent mean  $\pm$  SD. Source data are provided as a Source Data file.

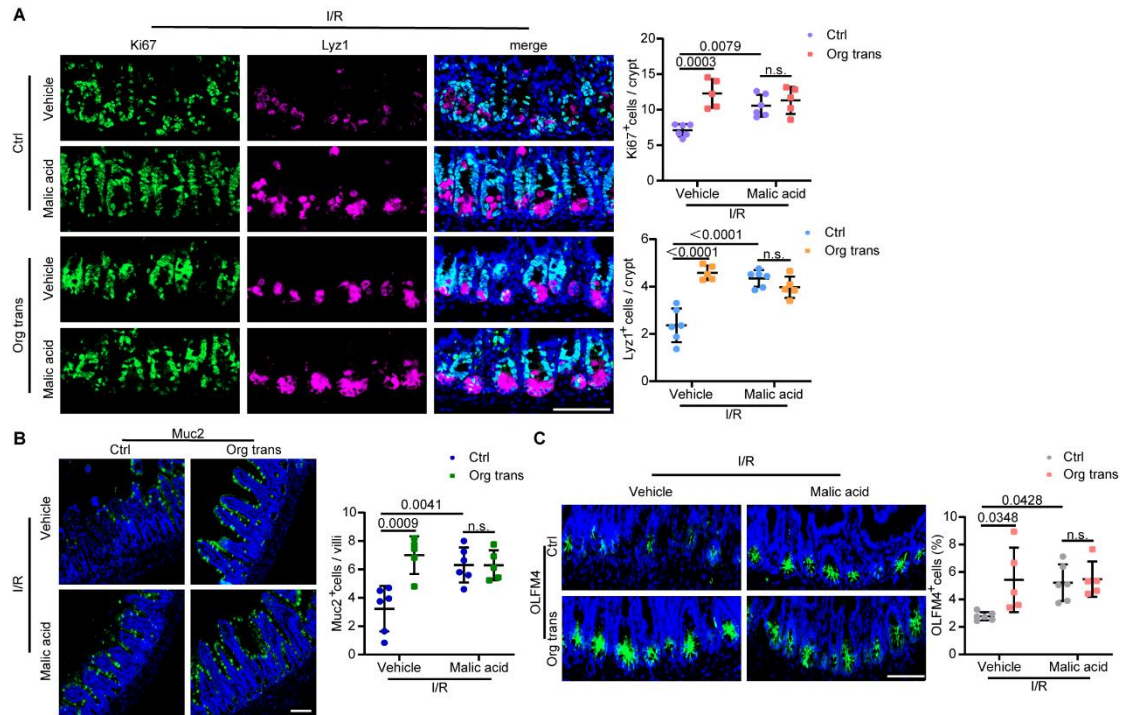

**Supplementary Figure 4. Administration of MA contribute to promote mucosal recovery and self-renewal. Related to Figure 5.**

(A) Immunofluorescence image of intestinal crypts following Ki67<sup>+</sup>, Lyz1<sup>+</sup> staining and quantification of Ki67<sup>+</sup>, Lyz1<sup>+</sup> Paneth cells (n = 5 mice for transplanted groups, n = 6 mice for the rest groups). (B) Immunofluorescence image of the intestinal villus following Muc2 staining and quantification of Muc2<sup>+</sup> goblet cells (n = 5 mice for transplanted groups, n = 6 mice for the rest groups). (C) Immunofluorescence image of intestinal crypts following OLFM4<sup>+</sup> staining and quantification of the mean immunofluorescence area of OLFM4<sup>+</sup> cells (n = 5 mice for transplanted groups, n = 6 mice for the rest groups). Twenty-five crypts or villus from each mouse were obtained for each group. Scale bar, 100  $\mu$ m. The statistical tests employed included: two-way ANOVA followed by the Tukey test for multiple comparisons. \*P < 0.05, \*\* P < 0.01,



\*\*\*  $P < 0.001$ , \*\*\*\*  $P < 0.0001$ . Each dot represents data from a single mouse (A-C).

Bar graphs represent mean  $\pm$  SD. Source data are provided as a Source Data file.

**Supplementary Table 1. Mouse primers used for qPCR analysis (5' to 3').**

**Related to Figure 1 to Figure 7 and supplemental Figure 2.**

| Gene          | forward                  | reverse                  |
|---------------|--------------------------|--------------------------|
| 18s           | AGTCCCTGCCCTTTGTACACA    | CGATCCGAGGGCCTCACTA      |
| Il-10         | GCCACATGCTCCTAGAGCTG     | CAGCTGGTCCTTTGTTTGAAA    |
| Ki67          | ACCGTGGAGTAGTTTATCTGGG   | TGTTTCCAGTCCGCTTACTTCT   |
| Lysozyme      | GAGACCGAAGCACCGACTATG    | CGGTTTTGACATTGTGTTTCGC   |
| CD206         | GCGCTGCGTGGACGCTCTAA     | ACAGGGTGACGGAAGCCCAGT    |
| ZO-1          | TGCAATTCCAAATCCAAACC     | AGAGACAAGATGTCCGCCAG     |
| Occludin      | GGACTGTCAACTCTTTCCGC     | CATTATGATGAACAGCCCC      |
| Il-1 $\beta$  | GGTCAAAGGTTTGGAAGCAG     | TGTGAAATGCCACCTTTTGA     |
| Il-6          | ACCAGAGGAAATTTCAATAGGC   | TGATGCACTTGCAGAAAACA     |
| TNF- $\alpha$ | AGGGTCTGGGCCATAGAACT     | CCACCACGCTCTTCTGTCTAC    |
| CD86          | TGCTCATCATTGTATGTCAC     | GTCTCTCTGTCAGCGTACT      |
| Ym1/2         | TCACAGGTCTGGCAATTCTTCTG  | TTTGCCTTAGGAGGGCTTCCTC   |
| Arg1          | CAGTTGGAAGCATCTCTGGC     | GTGAGCATCCACCCAAATGAC    |
| SOCS1         | ATGGTAGCACGCAACCAGGTG    | CTCCAGCAGCTCGAAAAGGCA    |
| SOCS2         | GGAAGTATGACTGTTAATGAAGCC | CCCAGATCGTACCGGTACATT    |
| SOCS3         | GCTCCAAAAGCGAGTACCAG     | GGATGCGTAGGTTCTTGGTC     |
| SOCS4         | CCTCGCTCAGATTTAGCCTTTAG  | TGGAACAAGGCAGTGGACGTA    |
| SOCS5         | GCCTTACAGCTGGGACTGAG     | AGTGGCTTTGACTGCTTGCT     |
| SOCS6         | CTCTCACCATTGCTACCTCCAA   | AGAGTCCCTGATTGAATGCTCGAT |

SOCS7

GAATTGCTCCCATCAGAGCGTCA

GTTCTTGGAGTGCATGATGGCTCT

**Supplementary Table 2. Flow cytometry antibodies.**

| ANTIBODIES                                            | SOURCE                      | IDENTIFIER  | DILUTION                                              |
|-------------------------------------------------------|-----------------------------|-------------|-------------------------------------------------------|
| Anti-mouse CD16/32, clone<br>2.4G2                    | BD Biosciences              | Cat# 553141 | 1 µg per 10 <sup>6</sup> cells<br>in 100 µl volume    |
| Anti-mouse CD11b, BV510,<br>clone M1/70               | Biolegend                   | Cat# 101263 | 0.4 µg per 10 <sup>6</sup> cells<br>in 100 µl volume  |
| Anti-mouse CD11b, PE, clone<br>M1/70                  | Biolegend                   | Cat# 101208 | 0.25 µg per 10 <sup>6</sup> cells<br>in 100 µl volume |
| Anti-mouse Ly-6G, PerCP/Cy5.5,<br>clone 1A8           | Biolegend                   | Cat# 127615 | 0.25 µg per 10 <sup>6</sup> cells<br>in 100 µl volume |
| Anti-mouse CD45, APC-Cy7,<br>clone I3/2.3             | Thermo Fisher<br>Scientific | Cat# A15395 | 0.2 µg per 10 <sup>6</sup> cells<br>in 100 µl volume  |
| Anti-mouse Ly-6C, PE-Cy7,<br>clone HK1.4              | Biolegend                   | Cat# 128017 | 0.06 µg per 10 <sup>6</sup> cells<br>in 100 µl volume |
| Anti-mouse CD206, APC, clone<br>C068C2                | Biolegend                   | Cat# 141707 | 0.5 µg per 10 <sup>6</sup> cells<br>in 100 µl volume  |
| Anti-mouse IL10, PE, clone<br>JES5-16E3               | Biolegend                   | Cat# 505007 | 1.0 µg per 10 <sup>6</sup> cells<br>in 100 µl volume  |
| Anti-mouse CX3CR1, BV421,<br>clone SA011F11           | Biolegend                   | Cat# 149023 | 0.03 µg per 10 <sup>6</sup> cells<br>in 100 µl volume |
| Anti-mouse I-A/I-E,<br>PerCP/Cy5.5, clone M5/114.15.2 | Biolegend                   | Cat# 107626 | 0.06 µg per 10 <sup>6</sup> cells<br>in 100 µl volume |

---

|                                      |           |             |                                                       |
|--------------------------------------|-----------|-------------|-------------------------------------------------------|
| Anti-mouse F4/80, FITC, clone<br>BM8 | Biolegend | Cat# 123108 | 0.25 µg per 10 <sup>6</sup> cells<br>in 100 µl volume |
| Anti-mouse CD3, BV605, clone<br>17A2 | Biolegend | Cat# 100237 | 5 µl per 10 <sup>6</sup> cells<br>in 100 µl volume    |

---
