# Supplementary material for: Organoids transplantation attenuates intestinal ischemia/reperfusion injury in mice through L-Malic acid-mediated M2 macrophage polarization
Source: PubMed Central journal article supplement (PMC10600233; doi:10.1038/s41467-023-42502-0), 2023-10-25
Supplement: 41467_2023_42502_MOESM3_ESM.pdf [file 41467_2023_42502_MOESM3_ESM.pdf]

## **Description of Additional Supplementary Files**

**Supplementary Data 1:** organoids conditioned medium-positive ion mode

**Supplementary Data 2:** organoids conditioned medium-negative ion mode

**Supplementary Data 3:** difference cecal contentsnegative ion mode

**Supplementary Data 4:** difference cecal contentspositive ion mode
